# Supplementary material for: Transcriptome Analysis of Caco-2 Cells upon the Exposure of Mycotoxin Deoxynivalenol and Its Acetylated Derivatives
Source: PubMed Central journal article supplement (PMC7927021; doi:10.3390/toxins13020167), 2021-02-22
Supplement: toxins-13-00167-s001.pdf [file toxins-13-00167-s001.pdf]

# Supplementary Materials: Transcriptome Analysis of Caco-2 Cells upon the Exposure of Mycotoxin Deoxynivalenol and Its Acetylated Derivatives

Yuyun He, Xiaoyao Yin, Jingjing Dong, Qing Yang, Yongning Wu and Zhiyong Gong

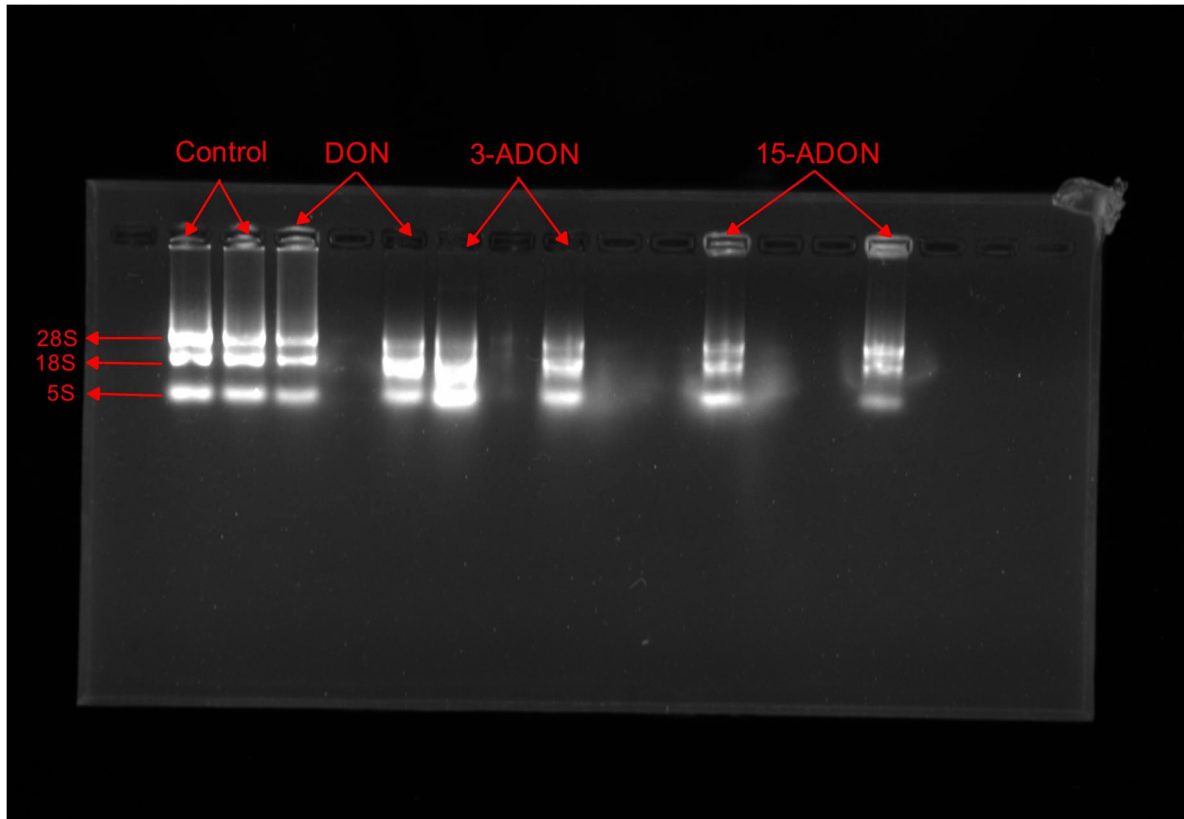

Figure S1. RNA degradation gels images.
